# Supplementary material for: Ewing Sarcoma of the Posterior Fossa in an Adolescent Girl
Source: Hindawi journal article supplement (doi:10.1155/2014/439830), 2014-01-01
Supplement: f1 [file 439830.f1.pdf]

R A F

A H

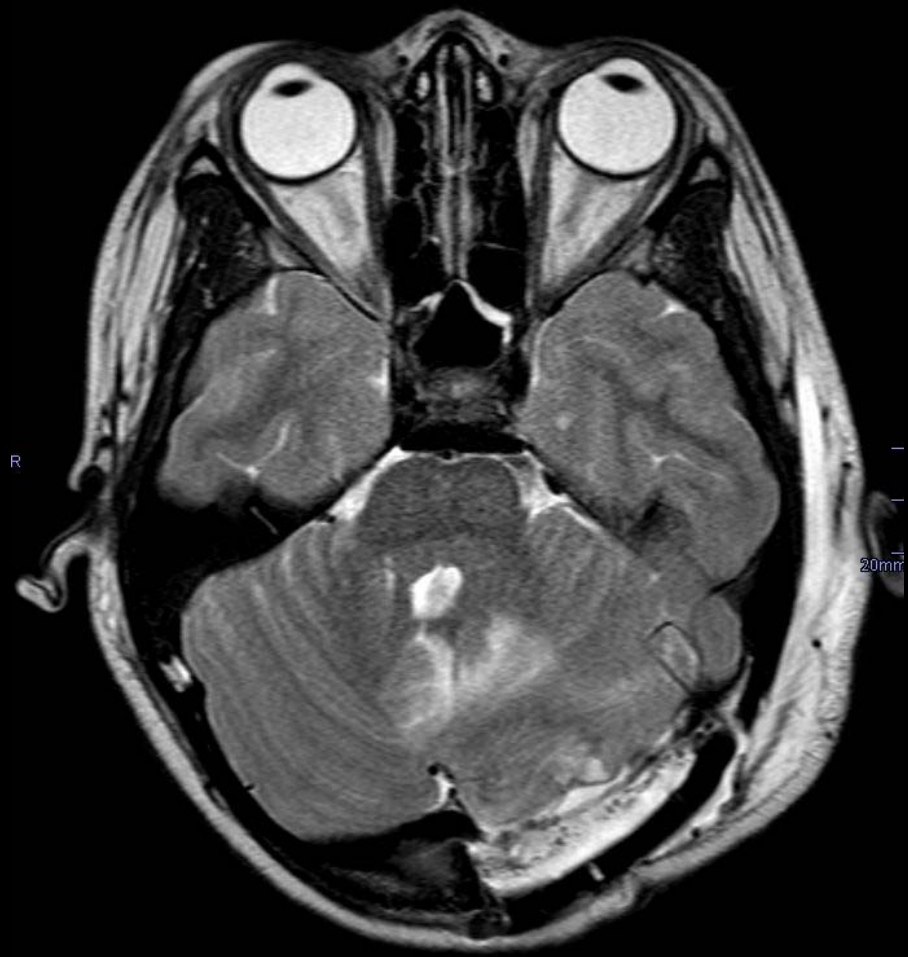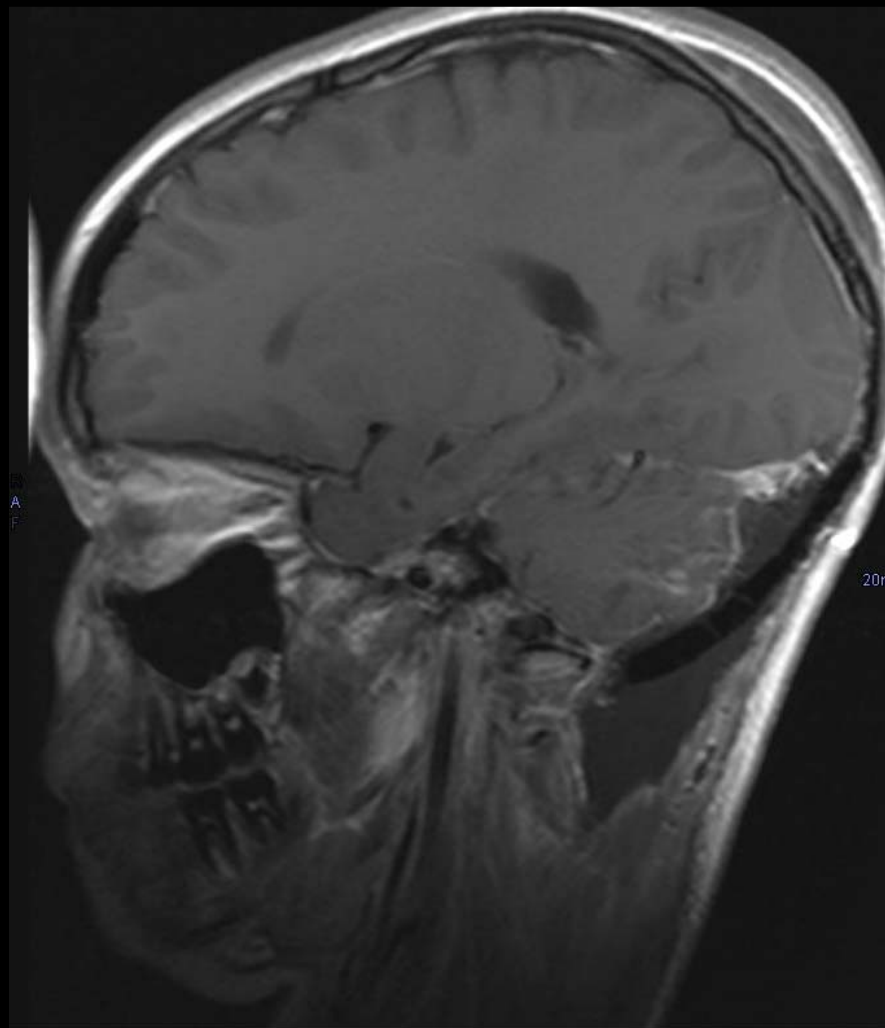

day 1 post operation

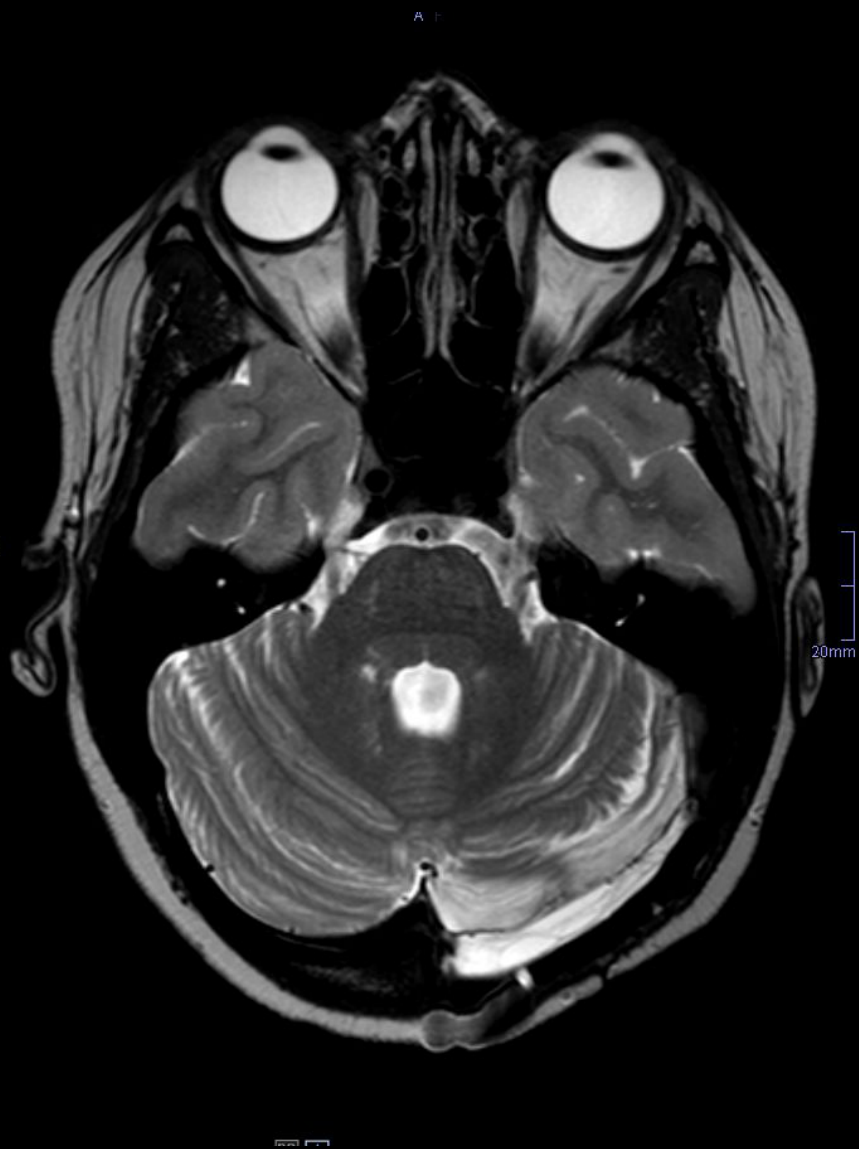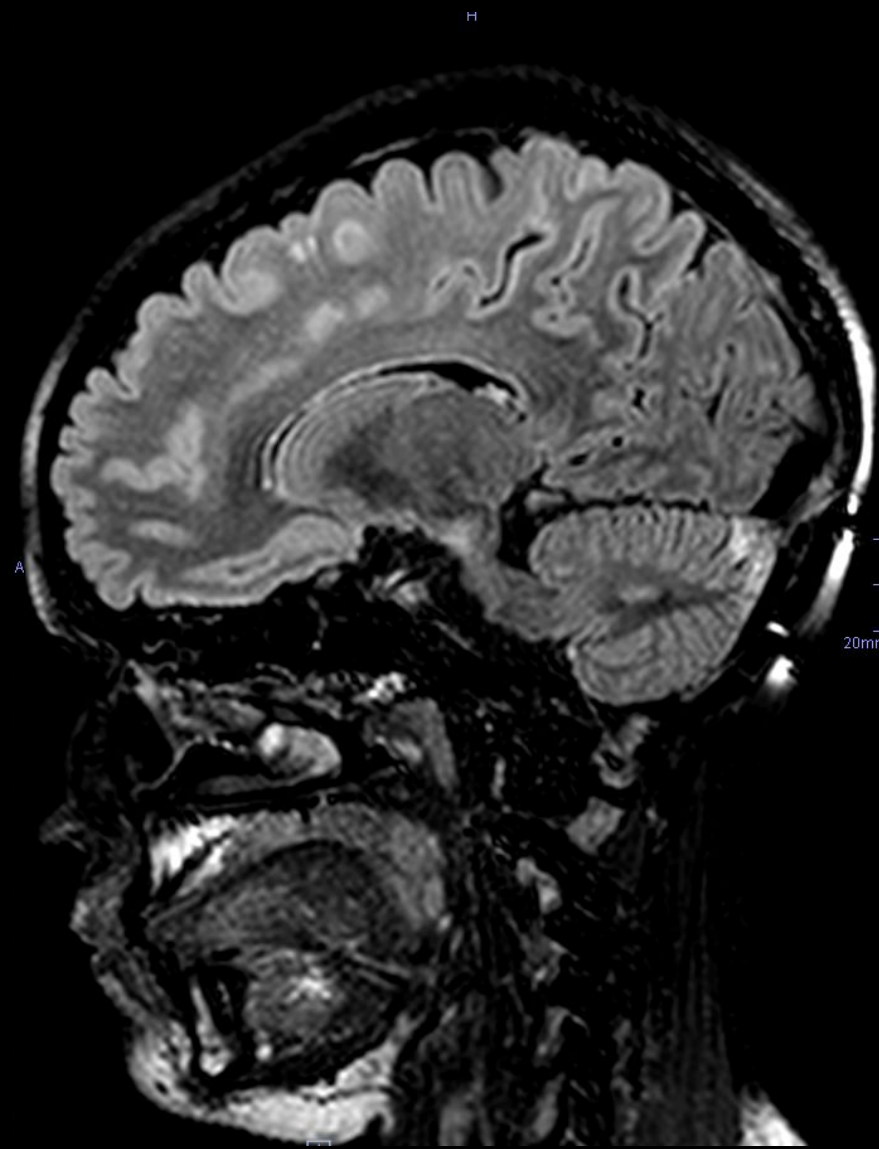

2 years postoperatively
